# Supplementary material for: Structure and properties of metal–organic frameworks modulated by sulfate ions
Source: Royal Society of Chemistry journal article supplement (doi:10.1039/d3dt01995k), 2023-01-01
Supplement: d3dt01995k1.pdf [file d3dt01995k1.pdf]

## Supplementary material

### **Structure and properties of metal-organic frameworks precisely modulated by sulfate ions**

Yuan-Yuan Guo, <sup>a,§</sup> Rui-Dong Wang, <sup>a,§</sup> Wei-Ming Wei, <sup>a</sup> Fang Fang, <sup>a</sup> Xu-Hui Zhao, <sup>a</sup> Suo-Shu Zhang, <sup>a</sup> Tian-Ze Shen <sup>a</sup>, Jun Zhang <sup>b</sup>, Qi-Hua Zhao <sup>\*a</sup> and Juan Wang <sup>\*c</sup>

<sup>a</sup> Key Laboratory of Medicinal Chemistry for Natural Resource, Ministry of Education and Yunnan Province, Yunnan Characteristic Plant Extraction Laboratory, School of Chemical Science and Technology, Yunnan University, 650500, People's Republic of China.

<sup>b</sup> New Energy Photovoltaic Industry Research Center, Qinghai University, Xining 810016, People's Republic of China.

<sup>c</sup> The School of Foreign Languages College, College of Arts and Sciences Kunming, Kunming, 650221, People's Republic of China.

§ These authors contribute equally to this work.

\* Corresponding author.

E-mail: [qhzhao@ynu.edu.cn](mailto:qhzhao@ynu.edu.cn); [373417614@qq.com](mailto:373417614@qq.com)

## Contents

|                                                                                                                                                                                                                                        |    |
|----------------------------------------------------------------------------------------------------------------------------------------------------------------------------------------------------------------------------------------|----|
| <b>Table S1.</b> Crystallographic data and structure refinement parameters for MOF-1 and MOF-2.....                                                                                                                                    | 4  |
| <b>Table S2.</b> Selected bond lengths (Å) and angles (°) for MOF-1.....                                                                                                                                                               | 5  |
| <b>Table S3.</b> Selected bond lengths (Å) and angles (°) for MOF-2.....                                                                                                                                                               | 8  |
| <b>Figure S1.</b> FT-IR of TIPE, MOF-1 and MOF-2.....                                                                                                                                                                                  | 11 |
| <b>Figure S2.</b> Coordination environment of MOF-1 (a) One-dimensional chain composed of $\text{SO}_4^{2-}$ and Cd; (b) One-dimensional chain composed of Cd2 and TIPE; (c) Two-dimensional layer composed of Cd1 and TIPE.....       | 11 |
| <b>Figure S3.</b> Coordination environment of MOF-2 (a) One-dimensional chain composed of $\text{SO}_4^{2-}$ and Cd; (b) Two-dimensional layer composed of Cd and TIPE.....                                                            | 11 |
| <b>Figure S4.</b> Schematic view of the 3D 4,4,6-connected network topology. The green nodes represent Cd(II) ions, and the blue nodes represent TIPE. ....                                                                            | 12 |
| <b>Figure S5.</b> (a) Coordination environment of Cd(II) ions in MOF-3; (b) 2D structure of MOF-3. Symmetry codes: (i) $x+1/2, y-1/2, z$ ; (ii) $x-1/2, y+1/2, z$ ; (iii) $x+1, y-2, z+1$ ; (iv) $x+1/2, y-3/2, z+1$ .....             | 12 |
| <b>Figure S6.</b> Solid-state fluorescence of MOF-1 ( $\lambda_{\text{ex}} = 395 \text{ nm}$ ), MOF-2 ( $\lambda_{\text{ex}} = 370 \text{ nm}$ ) and TIPE ( $\lambda_{\text{ex}} = 360 \text{ nm}$ ) ligands at room temperature. .... | 12 |
| <b>Figure S7.</b> (a) Temperature-responsive emissions of MOF-1 record between 77 and 297 K, (b) Temperature-responsive emissions of MOF-2 record between 77 and 297 K. ....                                                           | 13 |
| <b>Figure S8.</b> Luminescence decay lifetimes of MOF-1 (a) and MOF-2 (b) measured at the excitation ( $\lambda_{\text{ex}} = 375 \text{ nm}$ ).....                                                                                   | 13 |
| <b>Figure S9.</b> The fluorescence quantum yield curve measured for MOF-1 (a) and MOF-2 (b) powder sample at room temperature. ....                                                                                                    | 13 |
| <b>Figure S10.</b> (a) The fluorescence intensity of $\text{Fe}^{3+}$ ions recognized by MOF-1 after 6 cycles; (b) the fluorescence intensity of $\text{Fe}^{3+}$ ions recognized by MOF-2 after 6 cycles. ....                        | 14 |
| <b>Figure S11.</b> (a) The fluorescence intensity of $\text{Cr}_2\text{O}_7^{2-}$ ions recognized by MOF-1 after 6 cycles; (b) the fluorescence intensity of $\text{Cr}_2\text{O}_7^{2-}$ ions recognized by MOF-2 after 6 cycles..... | 14 |
| <b>Figure S12.</b> (a) and (b) Fluorescence spectra of MOF-3 in the presence of different metal ions; (c) and (d) Fluorescence spectra of MOF-3 in the presence of different anions. ....                                              | 14 |

|                                                                                                                                                                                |    |
|--------------------------------------------------------------------------------------------------------------------------------------------------------------------------------|----|
| <b>Table S4.</b> BET surface area, pore size and pore volumes of the MOFs.....                                                                                                 | 15 |
| <b>Figure S13.</b> N <sub>2</sub> adsorption-desorption isotherms of MOF-1(a), MOF-2(b) and MOF-3(c). .....                                                                    | 15 |
| <b>Figure S14.</b> SEM images of MOF-1(a), MOF-2(b) and MOF-3(c).....                                                                                                          | 15 |
| <b>Figure S15.</b> Fluorescence Photo of MOF-1-3 in solvent (a), in the presence of Fe <sup>3+</sup> ions (b) and Cr <sub>2</sub> O <sub>7</sub> <sup>2-</sup> ions (c). ..... | 16 |
| <b>Figure S16.</b> Ellipsoidal plots of the disordered structures of MOF-1 and MOF-2. ....                                                                                     | 16 |
| <b>Figure S17.</b> TGA curves of MOF-1(a) and MOF-2(b). .....                                                                                                                  | 16 |

**Table S1.** Crystallographic data and structure refinement parameters for MOF-1 and MOF-2

| Complex                                                                     | MOF-1                                                                      | MOF-2                                                          |
|-----------------------------------------------------------------------------|----------------------------------------------------------------------------|----------------------------------------------------------------|
| chemical formula                                                            | $C_{76}H_{60.8}Cd_3N_{16}O_{8.8}S_{1.6} \cdot 1.4(H_2O)_2 \cdot 6.2(H_2O)$ | $C_{76}H_{60}Cd_3N_{16}O_{14}S_3 \cdot 2(H_2O) \cdot 10[H_2O]$ |
| molecular weight                                                            | 1886.12                                                                    | 2071.13                                                        |
| crystal system                                                              | Monoclinic                                                                 | Monoclinic                                                     |
| space group                                                                 | <i>C2</i>                                                                  | <i>C2/c</i>                                                    |
| <i>A</i> (Å)                                                                | 31.694 (3)                                                                 | 32.054 (3)                                                     |
| <i>b</i> (Å)                                                                | 9.6200 (8)                                                                 | 9.6261 (9)                                                     |
| <i>c</i> (Å)                                                                | 16.0832 (13)                                                               | 31.428 (3)                                                     |
| <i>A</i> (deg)                                                              | 90                                                                         | 90                                                             |
| <i>β</i> (deg)                                                              | 100.727(3)                                                                 | 101.060(2)                                                     |
| <i>Γ</i> (deg)                                                              | 90                                                                         | 90                                                             |
| <i>V</i> (Å <sup>3</sup> )                                                  | 4818.0 (7)                                                                 | 9516.9 (14)                                                    |
| <i>Z</i>                                                                    | 2                                                                          | 4                                                              |
| <i>D<sub>x</sub></i> (Mg·m <sup>-3</sup> )                                  | 1.300                                                                      | 1.445                                                          |
| <i>μ</i> (MoKα) (mm <sup>-1</sup> )                                         | 0.75                                                                       | 0.82                                                           |
| <i>F</i> (000)                                                              | 1788                                                                       | 4608                                                           |
| reflections                                                                 | 6160                                                                       | 8873                                                           |
| <i>R</i> <sub>int</sub>                                                     | 0.064                                                                      | 0.090                                                          |
| data/restraints/parameters                                                  | 9050/602/566                                                               | 11889/340/584                                                  |
| GOF on <i>F</i> <sub>2</sub>                                                | 1.017                                                                      | 1.067                                                          |
| <i>R</i> <sub>1</sub> / <i>wR</i> <sub>2</sub> [ <i>I</i> > 2σ( <i>I</i> )] | 0.0645, 0.1550                                                             | 0.0735, 0.1946                                                 |
| <i>R</i> <sub>1</sub> / <i>wR</i> <sub>2</sub> [all data]                   | 0.1001, 0.1787                                                             | 0.0963, 0.2066                                                 |

$${}^a R_1 = \sum ||F_o| - |F_c|| / \sum |F_o|, {}^b wR^2 = [\sum w(F_o^2 - F_c^2)^2 / \sum w(F_o^2)]^{1/2}$$

**Table S2.** Selected bond lengths (Å) and angles (°) for MOF-1

|                       |            |         |            |
|-----------------------|------------|---------|------------|
| Cd1—N8 <sup>i</sup>   | 2.3 (2)    | C15—C25 | 1.418 (17) |
| Cd1—N8 <sup>ii</sup>  | 2.3 (2)    | C16—H16 | 0.950      |
| Cd1—N5 <sup>iii</sup> | 2.249 (11) | C16—C21 | 1.36 (2)   |
| Cd1—N5                | 2.249 (11) | C16—C22 | 1.390 (19) |
| Cd1—O13 <sup>iv</sup> | 2.343 (13) | C17—C35 | 1.340 (18) |
| Cd1—O13 <sup>v</sup>  | 2.343 (13) | C17—N9  | 1.385 (16) |
| Cd1—N10 <sup>i</sup>  | 2.29 (10)  | C18—H18 | 0.950      |
| Cd1—N10 <sup>ii</sup> | 2.29 (10)  | C18—C23 | 1.345 (18) |
| Cd2—N3 <sup>vi</sup>  | 2.244 (10) | C19—H19 | 0.950      |
| Cd2—N1                | 2.238 (14) | C20—H20 | 0.950      |
| Cd2—O5                | 2.239 (12) | C22—H22 | 0.950      |
| Cd2—O8 <sup>vii</sup> | 2.631 (19) | C23—H23 | 0.950      |
| Cd2—O14               | 2.304 (16) | C23—C27 | 1.365 (19) |
| Cd2—O1                | 2.434 (13) | C24—H24 | 0.950      |
| Cd2—O2                | 2.986 (19) | C24—C35 | 1.406 (19) |
| N4—C6                 | 1.428 (16) | C25—H25 | 0.950      |
| N4—C19                | 1.412 (18) | C26—H26 | 0.950      |
| N4—C29                | 1.369 (17) | C27—C37 | 1.37 (2)   |
| N2—C21                | 1.452 (17) | C28—H28 | 0.950      |
| N2—C30                | 1.350 (17) | C29—H29 | 0.950      |
| N2—C32                | 1.352 (19) | C30—H30 | 0.950      |
| N3—C9                 | 1.392 (19) | C30—C31 | 1.36 (2)   |
| N3—C29                | 1.294 (17) | C31—H31 | 0.950      |
| N6—C27                | 1.439 (17) | C32—H32 | 0.950      |
| N6—C34                | 1.363 (18) | C33—H33 | 0.950      |
| N6—C36                | 1.430 (19) | C33—C37 | 1.41 (2)   |
| N1—C31                | 1.35 (2)   | C34—H34 | 0.950      |

|         |            |                      |            |
|---------|------------|----------------------|------------|
| N1—C32  | 1.36 (2)   | C35—H35              | 0.950      |
| C1—C8   | 1.493 (18) | C36—H36              | 0.950      |
| C1—C24  | 1.40 (2)   | C36—C38              | 1.37 (2)   |
| C1—C25  | 1.376 (19) | C37—H37              | 0.950      |
| C2—H2   | 0.950      | C38—H38              | 0.950      |
| C2—C7   | 1.414 (19) | O5—S2                | 1.439 (11) |
| C2—C28  | 1.342 (19) | O5—S2 <sup>vii</sup> | 1.66 (3)   |
| N7—C3   | 1.420      | O5—O8 <sup>vii</sup> | 0.48 (4)   |
| N7—C5   | 1.420      | O6—O7 <sup>vii</sup> | 0.68 (4)   |
| N7—C17  | 1.406 (19) | O6—S2                | 1.448 (11) |
| C3—H3   | 0.950      | O6—S2 <sup>vii</sup> | 1.85 (2)   |
| C3—C4   | 1.420      | O7—O7 <sup>vii</sup> | 1.70 (4)   |
| C4—H4   | 0.950      | O7—S2                | 1.432 (11) |
| C4—N8   | 1.420      | O7—S2 <sup>vii</sup> | 1.14 (2)   |
| N8—C5   | 1.420      | S2—S2 <sup>vii</sup> | 0.49 (2)   |
| C5—H5   | 0.950      | S2—O8                | 1.434 (11) |
| N5—C34  | 1.354 (19) | S2—O8 <sup>vii</sup> | 1.35 (3)   |
| N5—C38  | 1.398 (19) | S4—O13               | 1.444 (14) |
| C6—C20  | 1.34 (2)   | S4—O14               | 1.467 (17) |
| C6—C28  | 1.394 (19) | S4—O15               | 1.39 (2)   |
| C7—C12  | 1.472 (16) | S4—O16               | 1.452 (19) |
| C7—C14  | 1.401 (17) | C39—H39              | 0.950      |
| C8—C10  | 1.496 (18) | C39—C40              | 1.420      |
| C8—C12  | 1.356 (17) | C39—N9               | 1.420      |
| C9—H9   | 0.950      | C40—H40              | 0.950      |
| C9—C19  | 1.358 (19) | C40—N10              | 1.420      |
| C10—C18 | 1.397 (18) | N10—C41              | 1.420      |
| C10—C33 | 1.35 (2)   | C41—H41              | 0.950      |

|         |            |                        |       |
|---------|------------|------------------------|-------|
| C11—H11 | 0.950      | C41—N9                 | 1.420 |
| C11—C21 | 1.381 (18) | O1—H1A                 | 0.870 |
| C11—C26 | 1.402 (18) | O1—H1B                 | 0.870 |
| C12—C13 | 1.471 (17) | O2—H2A                 | 0.967 |
| C13—C22 | 1.428 (19) | O2—H2B                 | 0.870 |
| C13—C26 | 1.377 (17) | O3—H3A <sup>viii</sup> | 0.869 |
| C14—H14 | 0.950      | O3—H3A                 | 0.869 |
| C14—C20 | 1.433 (19) | O4—H4A                 | 0.870 |
| C15—H15 | 0.950      | O9—H9A                 | 0.984 |
| C15—C17 | 1.348 (19) |                        |       |

Symmetry codes: (i)  $-x+1/2, y-1/2, -z$ ; (ii)  $x-1/2, y-1/2, z$ ; (iii)  $-x, y, -z$ ; (iv)  $-x+1/2, y-1/2, -z+1$ ; (v)  $x-1/2, y-1/2, z-1$ ; (vi)  $x+1/2, y+1/2, z$ ; (vii)  $-x+1, y, -z+1$ ; (viii)  $-x+1, y, -z+2$ ; (ix)  $x+1/2, y+1/2, z+1$ .

**Table S3.** Selected bond lengths (Å) and angles (°) for MOF-2

|                       |           |         |            |
|-----------------------|-----------|---------|------------|
| Cd1—O4 <sup>i</sup>   | 2.374 (9) | C34—C35 | 1.400 (8)  |
| Cd1—O4 <sup>ii</sup>  | 2.374 (9) | C32—H32 | 0.950      |
| Cd1—N1                | 2.301 (5) | C32—C30 | 1.383 (8)  |
| Cd1—N1 <sup>iii</sup> | 2.301 (5) | C37—H37 | 0.950      |
| Cd1—N3 <sup>iv</sup>  | 2.285 (5) | C24—H24 | 0.950      |
| Cd1—N3 <sup>v</sup>   | 2.285 (5) | C24—C25 | 1.384 (8)  |
| Cd1—O5 <sup>ii</sup>  | 2.345 (9) | C3—H3   | 0.950      |
| Cd1—O5 <sup>i</sup>   | 2.345 (9) | C22—H22 | 0.950      |
| Cd2—O1                | 2.268 (9) | C22—C23 | 1.383 (7)  |
| Cd2—N7                | 2.229 (5) | C23—H23 | 0.950      |
| Cd2—N5 <sup>iv</sup>  | 2.217 (5) | C35—C33 | 1.392 (8)  |
| Cd2—O6                | 2.29 (3)  | C30—C31 | 1.395 (8)  |
| Cd2—O10               | 2.203 (7) | C15—H15 | 0.950      |
| Cd2—O7                | 2.282 (9) | C15—C10 | 1.372 (8)  |
| S2—O6                 | 1.455 (9) | C15—C14 | 1.396 (8)  |
| S2—O14                | 1.449 (8) | C27—H27 | 0.950      |
| S2—O11                | 1.447 (8) | C33—H33 | 0.950      |
| S2—O3                 | 1.447 (7) | C33—C31 | 1.379 (8)  |
| S1—O1                 | 1.479 (7) | C25—H25 | 0.950      |
| S1—O4                 | 1.467 (7) | C9—H9   | 0.950      |
| S1—O8                 | 1.458 (7) | C9—C4   | 1.390 (9)  |
| S1—O12                | 1.465 (7) | C29—H29 | 0.950      |
| N7—C37                | 1.328 (7) | C29—C28 | 1.348 (8)  |
| N7—C38                | 1.364 (9) | C31—H31 | 0.950      |
| N8—C37                | 1.348 (8) | C10—C19 | 1.499 (8)  |
| N8—C35                | 1.438 (7) | C10—C11 | 1.397 (10) |
| N8—C36                | 1.365 (8) | C38—H38 | 0.950      |



|         |            |          |            |
|---------|------------|----------|------------|
| N6—C26  | 1.430 (7)  | C38—C36  | 1.345 (9)  |
| N6—C27  | 1.353 (7)  | C14—H14  | 0.950      |
| N6—C29  | 1.372 (8)  | C14—C13  | 1.392 (9)  |
| N2—C3   | 1.333 (8)  | C28—H28  | 0.950      |
| N2—C4   | 1.430 (8)  | C36—H36  | 0.950      |
| N2—C2   | 1.363 (9)  | C13—C12  | 1.357 (10) |
| N5—C27  | 1.304 (7)  | C18—H18  | 0.950      |
| N5—C28  | 1.392 (8)  | C17—H17  | 0.950      |
| N4—C13  | 1.425 (7)  | C17—C16  | 1.355 (9)  |
| N4—C18  | 1.348 (8)  | C4—C5    | 1.388 (9)  |
| N4—C16  | 1.386 (8)  | C16—H16  | 0.950      |
| N1—C3   | 1.310 (8)  | O10—H10A | 0.882      |
| N1—C1   | 1.357 (10) | O10—H10B | 0.882      |
| N3—C18  | 1.312 (7)  | C11—H11  | 0.950      |
| N3—C17  | 1.391 (9)  | C11—C12  | 1.401 (9)  |
| C8—H8   | 0.950      | C6—H6    | 0.950      |
| C8—C7   | 1.371 (8)  | C6—C5    | 1.389 (9)  |
| C8—C9   | 1.394 (8)  | C12—H12  | 0.950      |
| C21—C20 | 1.501 (7)  | C1—H1    | 0.950      |
| C21—C24 | 1.381 (8)  | C1—C2    | 1.359 (10) |
| C21—C22 | 1.387 (8)  | C2—H2    | 0.950      |
| C20—C30 | 1.490 (7)  | C5—H5    | 0.950      |
| C20—C19 | 1.341 (8)  | O7—S1A   | 1.500 (9)  |
| C26—C23 | 1.395 (8)  | S1A—O2   | 1.469 (9)  |
| C26—C25 | 1.386 (8)  | S1A—O9   | 1.462 (10) |
| C7—C19  | 1.507 (7)  | S1A—O5   | 1.476 (8)  |
| C7—C6   | 1.380 (10) | O13—H13A | 0.937      |
| C34—H34 | 0.950      | O13—H13B | 0.960      |

|         |           |          |       |
|---------|-----------|----------|-------|
| C34—C32 | 1.375 (8) | O13—H13C | 0.876 |
|---------|-----------|----------|-------|

Symmetry codes: (i)  $-x+1, y, -z+1/2$ ; (ii)  $x, -y+1, z+1/2$ ; (iii)  $-x+1, -y+1, -z+1$ ; (iv)  $x-1/2, y+1/2, z$ ; (v)  $-x+3/2, -y+1/2, -z+1$ ; (vi)  $x+1/2, y-1/2, z$ .

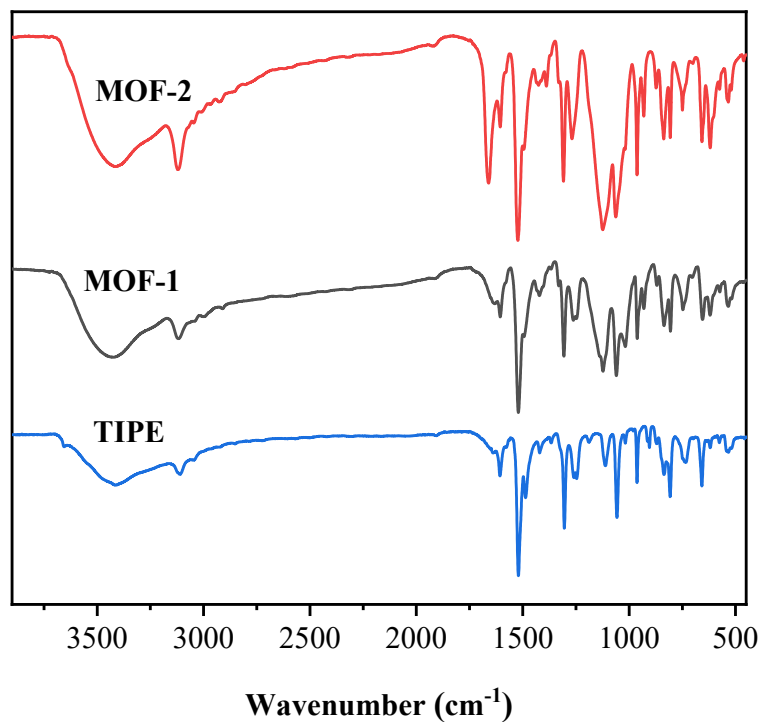

**Figure S1.** FT-IR of TIPE, MOF-1 and MOF-2.

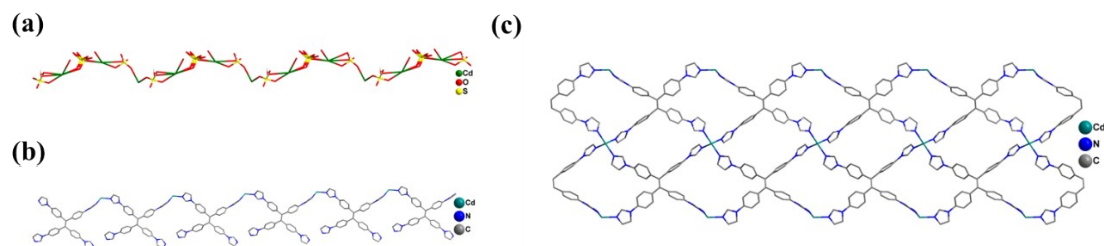

**Figure S2.** Coordination environment of MOF-1 (a) One-dimensional chain composed of  $\text{SO}_4^{2-}$  and Cd; (b) One-dimensional chain composed of Cd2 and TIPE; (c) Two-dimensional layer composed of Cd1 and TIPE.

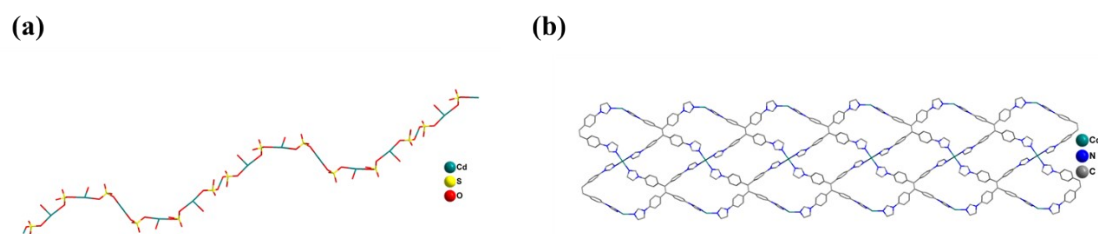

**Figure S3.** Coordination environment of MOF-2 (a) One-dimensional chain composed of  $\text{SO}_4^{2-}$  and Cd; (b) Two-dimensional layer composed of Cd and TIPE.

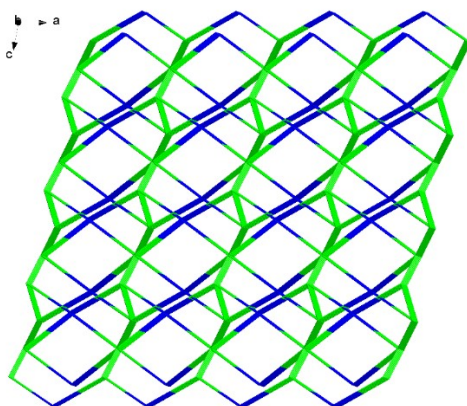

**Figure S4.** Schematic view of the 3D 4,4,6-connected network topology. The green nodes represent Cd(II) ions, and the blue nodes represent TIPE.

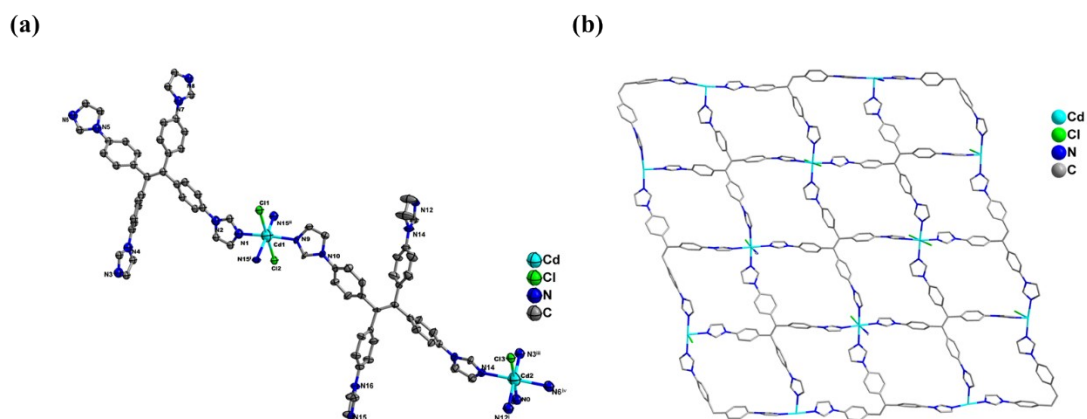

**Figure S5.** (a) Coordination environment of Cd(II) ions in MOF-3; (b) 2D structure of MOF-3. Symmetry codes: (i)  $x+1/2, y-1/2, z$ ; (ii)  $x-1/2, y+1/2, z$ ; (iii)  $x+1, y-2, z+1$ ; (iv)  $x+1/2, y-3/2, z+1$ .

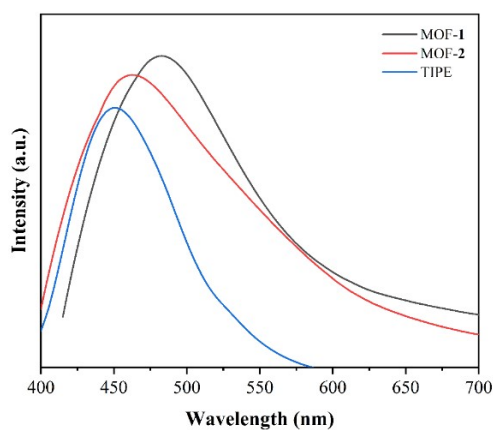

**Figure S6.** Solid-state fluorescence of MOF-1 ( $\lambda_{\text{ex}} = 395 \text{ nm}$ ), MOF-2 ( $\lambda_{\text{ex}} = 370 \text{ nm}$ ) and TIPE ( $\lambda_{\text{ex}} = 360 \text{ nm}$ ) ligands at room temperature.

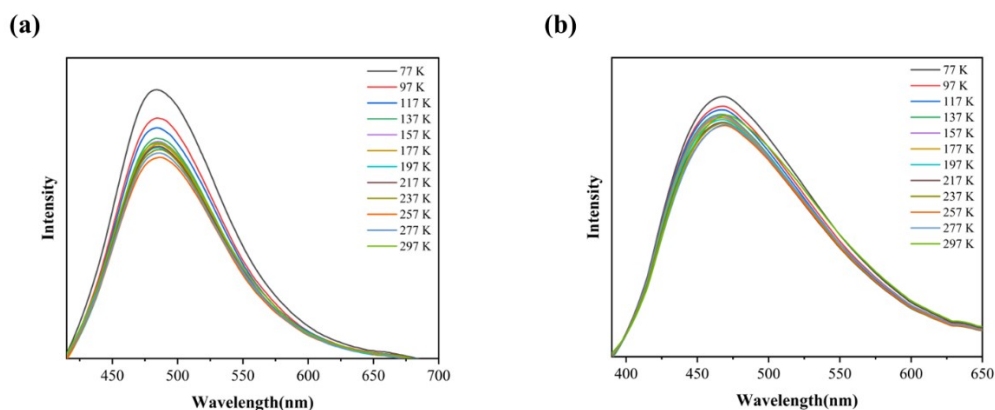

**Figure S7.** (a) Temperature-responsive emissions of MOF-1 record between 77 and 297 K, (b) Temperature-responsive emissions of MOF-2 record between 77 and 297 K.

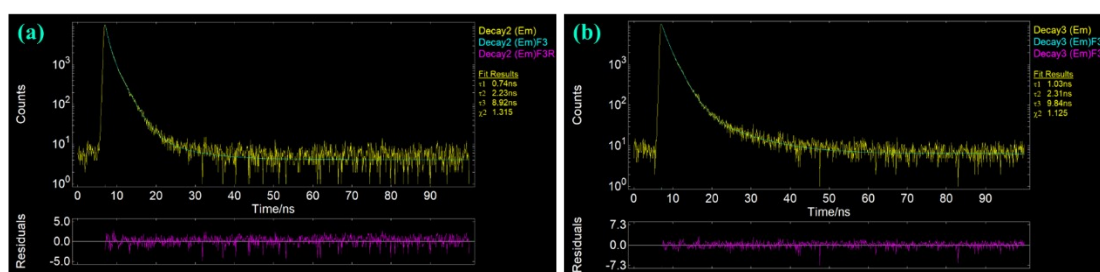

**Figure S8.** Luminescence decay lifetimes of MOF-1 (a) and MOF-2 (b) measured at the excitation ( $\lambda_{\text{ex}} = 375 \text{ nm}$ ).

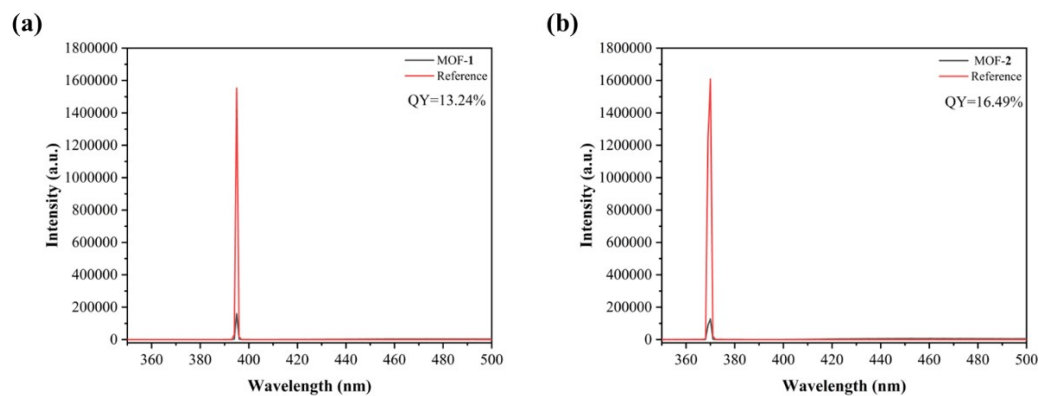

**Figure S9.** The fluorescence quantum yield curve measured for MOF-1 (a) and MOF-2 (b) powder sample at room temperature.

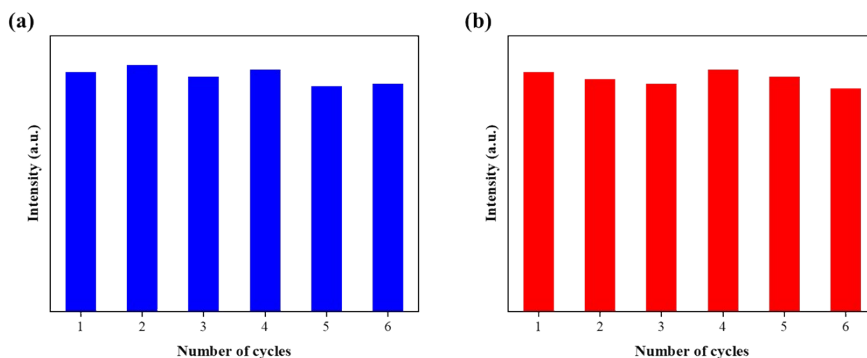

**Figure S10.** (a) The fluorescence intensity of Fe<sup>3+</sup> ions recognized by MOF-1 after 6 cycles; (b) the fluorescence intensity of Fe<sup>3+</sup> ions recognized by MOF-2 after 6 cycles.

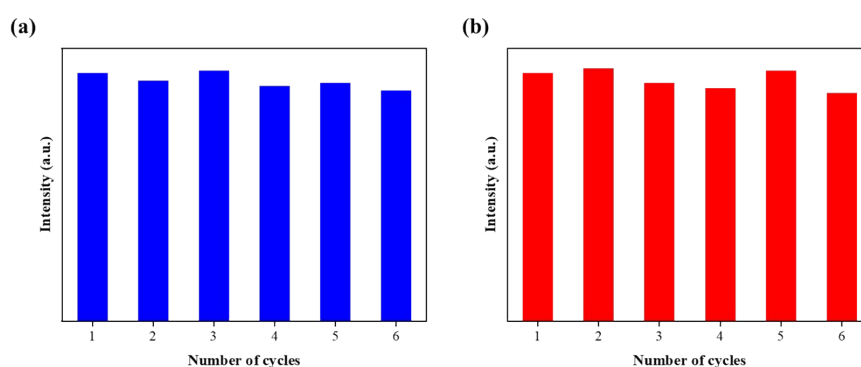

**Figure S11.** (a) The fluorescence intensity of Cr<sub>2</sub>O<sub>7</sub><sup>2-</sup> ions recognized by MOF-1 after 6 cycles; (b) the fluorescence intensity of Cr<sub>2</sub>O<sub>7</sub><sup>2-</sup> ions recognized by MOF-2 after 6 cycles.

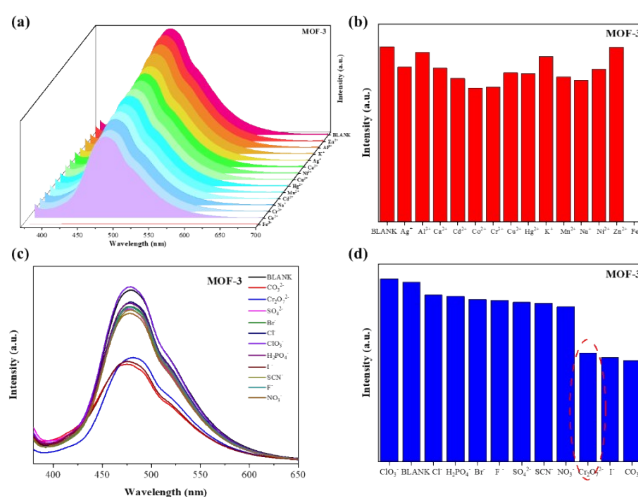

**Figure S12.** (a) and (b) Fluorescence spectra of MOF-3 in the presence of different metal ions; (c) and (d) Fluorescence spectra of MOF-3 in the presence of different anions.

MOF-3 can recognize  $\text{Fe}^{3+}$  ions, but not  $\text{Cr}_2\text{O}_7^{2-}$  ions.

**Table S4.** BET surface area, pore size and pore volumes of the MOFs.

| Properties                                       | MOF-1     | MOF-2    | MOF-3    |
|--------------------------------------------------|-----------|----------|----------|
| BET surface area ( $\text{m}^2/\text{g}$ )       | 0.674     | 0.6622   | 0.2018   |
| Langmuir surface area ( $\text{m}^2/\text{g}$ )  | 0.8440    | 1.1692   | 0.5801   |
| Micropore surface area ( $\text{m}^2/\text{g}$ ) | 1.7895    | 0.7415   | 0.2018   |
| Pore volume ( $\text{cm}^3/\text{g}$ )           | 0.002137  | 0.002753 | 0.001406 |
| Pore size (nm)                                   | 126.81777 | 16.62894 | 29.8350  |

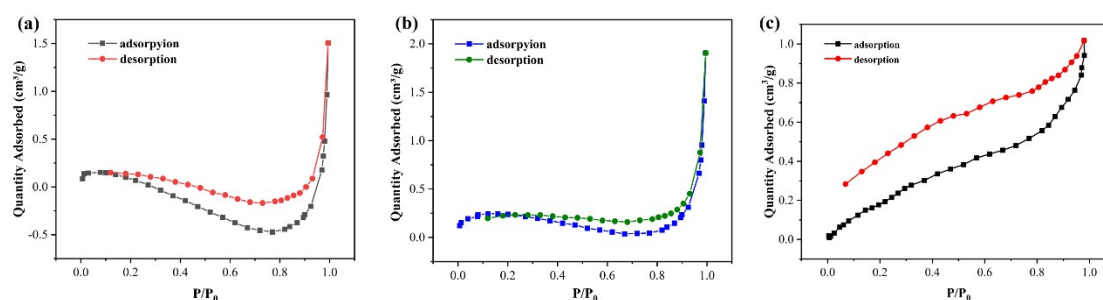

**Figure S13.**  $\text{N}_2$  adsorption-desorption isotherms of MOF-1(a), MOF-2(b) and MOF-3(c).

From the results obtained, the pore size and the characteristic pore volumes revealed the porous nature of MOF-1 and MOF-2.

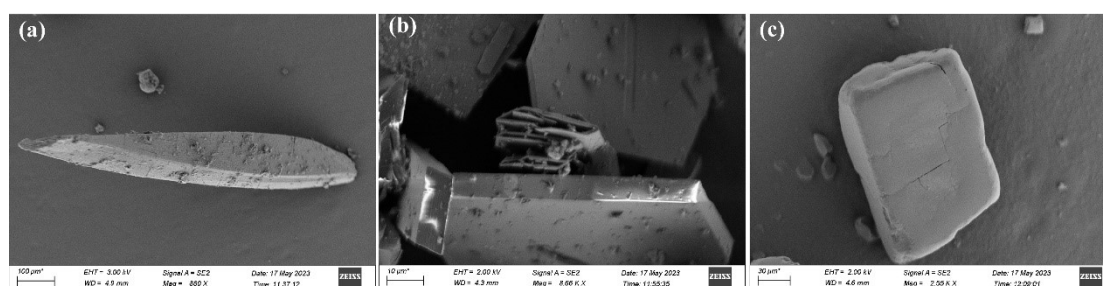

**Figure S14.** SEM images of MOF-1(a), MOF-2(b) and MOF-3(c).

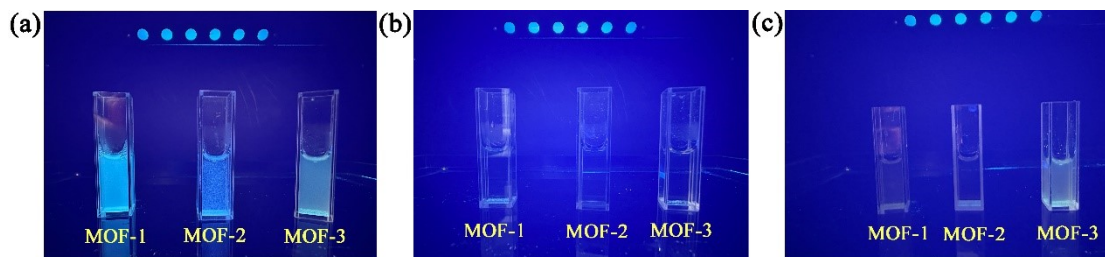

**Figure S15.** Fluorescence Photo of MOF-1-3 in solvent (a), in the presence of  $\text{Fe}^{3+}$  ions (b) and  $\text{Cr}_2\text{O}_7^{2-}$  ions (c).

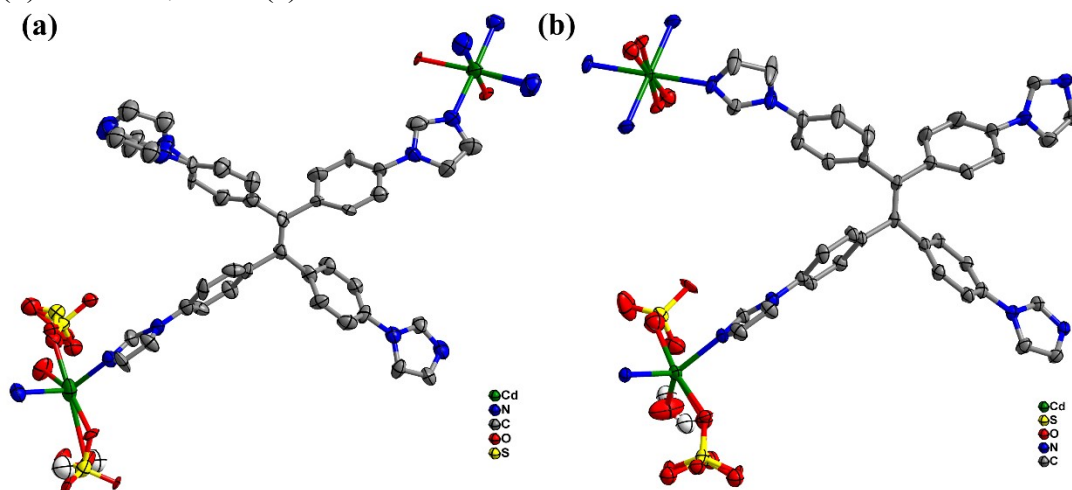

**Figure S16.** Ellipsoidal plots of the disordered structures of MOF-1 and MOF-2.

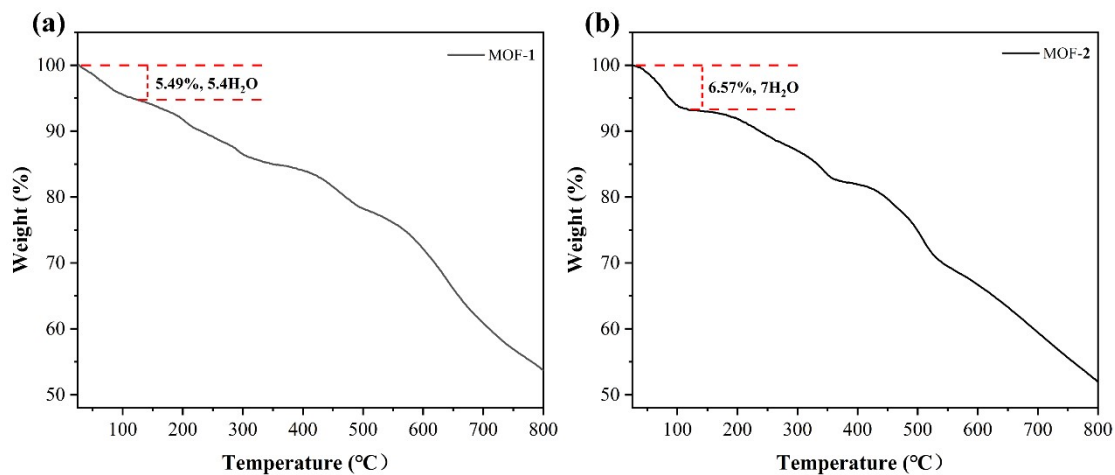

**Figure S17.** TGA curves of MOF-1(a) and MOF-2(b).

The TGA curves of MOF-1 indicate that it loses 5.4 water molecules, comprising 2.4 coordinated water molecules and three free water molecules, in the temperature range of 25°C to 140°C, resulting in a weight loss of 5.49% (calculated value: 5.42%) (Figure S17a). The TGA curves of MOF-2 show that it loses seven water molecules in the temperature range of 25°C to 112°C, leading to a weight loss of 6.57% (calculated



value: 6.26%) (Figure S17b). However, the single-crystal data results indicate the presence of nine free water molecules in MOF-1 and ten free water molecules in MOF-2. This can be attributed to the natural drying process of the crystals during thermal testing, which may have caused some water to evaporate. Additionally, the presence of relatively large pores in the structure could lead to the loss of water molecules. Therefore, the number of water molecules calculated by TGA is less than that observed in the crystal data. We respect the experimental results and have written the molecular formulas based on the conclusions from the single-crystal data.

### References

1. Wang, R.-D.; Zhang, W.-Q.; Zhou, S.; Tang, J.; He, M.; Zhang, S.; Du, L.; Zhao, Q.-H., A novel dual-functional coordination polymer for detection and ultra-effectively removal of Fe(III) in water. *Journal of Molecular Liquids* **2022**, 355.
2. Wang, R. D.; He, L.; Zhu, R. R.; Jia, M.; Zhou, S.; Tang, J.; Zhang, W. Q.; Du, L.; Zhao, Q. H., Highly efficient and selective capture Pb(II) through a novel metal-organic framework containing bifunctional groups. *J. Hazard. Mater* **2022**, 427, 127852.
3. Li, Y.; Dong, Y.; Miao, X.; Ren, Y.; Zhang, B.; Wang, P.; Yu, Y.; Li, B.; Isaacs, L.; Cao, L., Shape-Controllable and Fluorescent Supramolecular Organic Frameworks Through Aqueous Host-Guest Complexation. *Angew Chem Int Ed Engl* **2018**, 57 (3), 729-733.
4. Fan, W.; Liu, X.; Cheng, Y.; Qin, Y.; Yang, S.; Lu, Z.; Liu, Y.; Cao, Q.; Zheng, L., Two-dimensional metal-organic framework nanobelts for selective Fe<sup>3+</sup> removal from aqueous solution with high adsorption capacity. *Separation and Purification Technology* **2020**, 239.
